# Supplementary material for: Efficient immobilisation of industrial biocatalysts: criteria and constraints for the selection of organic polymeric carriers and immobilisation methods
Source: Royal Society of Chemistry journal article supplement (doi:10.1039/c3cs35464d), 2013-01-01
Supplement: c3cs35464d.pdf [file c3cs35464d.pdf]

## Efficient immobilisation of industrial biocatalysts: criteria and constraints for the selection of organic polymeric carriers and immobilisation methods

Sara Cantone,<sup>a</sup> Valerio Ferrario,<sup>b</sup> Livia Corici,<sup>a</sup> Cynthia Ebert,<sup>b</sup> Diana Fattor,<sup>a</sup> Patrizia Spizzo,<sup>a</sup> and Lucia Gardossi<sup>\*,b</sup>

<sup>a</sup> SPRIN s.p.a. c/o BIC Incubatori FVG, Via Flavia 23/1, 34148, Trieste (TS), Italy

<sup>b</sup> Laboratory of Applied and Computational Biocatalysis, Department of Scienze Chimiche e Farmaceutiche, Università degli Studi di Trieste, Piazzale Europa 1, 34127, Trieste (TS), Italy

\* gardossi@units.it

**Table S1:** Synthetic organic polymers employed for enzyme adsorption and available on the market. Legend: a) Resindion S.r.l. (Mitsubishi Chemical Corporation); b) Lanxess; c) Rohm and Haas Company; d) Purolite International Ltd; e) ChiralVision; f) Degussa Röhm GmbH & Co. KG; g) Membrana GmbH; h) SPRIN S.p.A.

| Product Name                             | Chemical Matrix                          | Functional group | Surface area (m <sup>2</sup> /g) | Pore volume (ml/g) | Pore diameter (Å) |
|------------------------------------------|------------------------------------------|------------------|----------------------------------|--------------------|-------------------|
| <sup>a</sup> Sepabeads EC-OD/S           | polyacrylic                              | octadecyl        |                                  |                    | 100-200           |
| <sup>a</sup> ReliZyme OD403              | polyacrylic                              | octadecyl        |                                  |                    | 400-600           |
| <sup>a</sup> Sepabeads EC-BU/S           | poly(methacrylate)                       | butyl            |                                  |                    | 100-200           |
| <sup>a</sup> ReliZyme BU403              | poly(methacrylate)                       | butyl            |                                  |                    | 400-600           |
| <sup>a</sup> Sepabeads EC-OC/S           | poly(methacrylate)                       | octyl            |                                  |                    | 100-200           |
| <sup>a</sup> ReliZyme OC403              | poly(methacrylate)                       | octyl            |                                  |                    | 400-600           |
| <sup>b</sup> Lewatit VP OC 1600          | poly(methyl methacrylate-divinylbenzene) | -                | 130                              | 0.5                | 150               |
| <sup>c</sup> Amberlite XAD 118 ON        | poly(styrene-divinylbenzene)             | -                | ≥ 450                            | ≥1.4               | 400-450           |
| <sup>c</sup> Amberlite XAD-7             | polyacrylic                              | -                | ≥ 380                            | 0.65               | N/A               |
| <sup>d</sup> ECR8806 Octadecyl acrylate  | polyacrylic                              | octadecyl        | > 80                             | N/A                | 500-700           |
| <sup>d</sup> ECR1811 Octadecyl styrene   | polystyrene                              | octadecyl        | > 200                            | N/A                | 1000-1200         |
| <sup>d</sup> ECR1090 Macroporous styrene | polystyrene                              | -                | > 750                            | N/A                | 900-1100          |
| <sup>e</sup> IB-EC1                      | polyacrylic                              | -                | N/A                              | N/A                | N/A               |
| <sup>e</sup> IB-S861                     | polystyrene                              | -                | N/A                              | N/A                | N/A               |
| <sup>e</sup> IB-S500                     | polypropylene                            | -                | N/A                              | N/A                | N/A               |
| <sup>f</sup> Eudragit S-100              | poly(methacrylate)                       | -                | N/A                              | N/A                | N/A               |

|                               |                              |           |         |         |         |
|-------------------------------|------------------------------|-----------|---------|---------|---------|
| <sup>g</sup> Accurel MP1000   | polypropylene                | -         | 80-100  | N/A     | 50-500  |
| <sup>h</sup> SPRINbeads SN110 | poly(styrene-divinylbenzene) | -         | 590     | 1.3     | 400-600 |
| <sup>h</sup> SPRINbeads AO110 | polyacrylic                  | octadecyl | 60-80   | 0.2-0.4 | 100-200 |
| <sup>h</sup> SPRINbeads AN110 | polyacrylic                  | -         | 120-140 | 0.4-0.6 | 150-200 |

**Table S2:** A number of synthetic organic polymers employed for ionic immobilisation available on the market. Legend: a) Resindion S.r.l. (Mitsubishi Chemical Corporation); b) ChiralVision

| Product Name                 | Chemical Matrix    | Functional group    | Pore diameter (Å) |
|------------------------------|--------------------|---------------------|-------------------|
| <sup>a</sup> Sepabeads EC-EA | poly(methacrylate) | ethylamino          | 100-200           |
| <sup>a</sup> Sepabeads EC-HA | poly(methacrylate) | hexamethylamino     | 100-200           |
| <sup>b</sup> IB-D152         | polyacrylic        | carboxylic acid     | N/A               |
| <sup>b</sup> IB-C435         | polyacrylic        | carboxylic acid     | N/A               |
| <sup>b</sup> IB-A161         | polystyrene        | quaternary ammonium | N/A               |
| <sup>b</sup> IB-A171         | polystyrene        | quaternary ammonium | N/A               |
| <sup>b</sup> IB-A369         | polystyrene        | quaternary ammonium | N/A               |

**Table S3:** Organic synthetic polymers available for covalent immobilisation. Legend: a) Resindion S.r.l. (Mitsubishi Chemical Corporation); b) ChiralVision; c) Fermenta Biotech Ltd.; d) Purolite International Ltd; e) Degussa Röhm GmbH & Co. KG; f) SPRIN S.p.a.

| Product Name                 | Chemical Matrix | Functional group     | Surface area (m <sup>2</sup> /g) | Pore volume (ml/g) | Pore diameter (Å) |
|------------------------------|-----------------|----------------------|----------------------------------|--------------------|-------------------|
| <sup>a</sup> Sepabeads EC-EP | polyacrylic     | epoxy                | N/A                              | N/A                | 100-200           |
| <sup>a</sup> Relizyme EP403  | polyacrylic     | epoxy                | N/A                              | N/A                | 400-600           |
| <sup>a</sup> Sepabeads EC-EA | polyacrylic     | amino - short spacer | N/A                              | N/A                | 100-200           |
| <sup>a</sup> Relizyme EA403  | polyacrylic     | amino - short spacer | N/A                              | N/A                | 400-600           |
| <sup>a</sup> Sepabeads EC-HA | polyacrylic     | amino - long spacer  | N/A                              | N/A                | 100-200           |
| <sup>a</sup> Relizyme HA403  | polyacrylic     | amino - long spacer  | N/A                              | N/A                | 400-600           |
| <sup>a</sup> Sepabeads       | polyacrylic     | epoxy-               | N/A                              | N/A                | 100-200           |

|                                            |                 |                      |       |         |           |
|--------------------------------------------|-----------------|----------------------|-------|---------|-----------|
| EC-HFA                                     |                 | amino                |       |         |           |
| <sup>a</sup> Relizyme HFA403               | polyacrylic     | epoxy-amino          | N/A   | N/A     | N/A       |
| <sup>b</sup> IB150                         | polyacrylic     | epoxy                | N/A   | 3.0     | N/A       |
| <sup>c</sup> Dilbeads-TA                   | polyacrylic     | epoxy                | N/A   | 3.0     | N/A       |
| <sup>d</sup> ECR8205 Epoxy acrylate        | polyacrylic     | epoxy                | >80   | N/A     | 450-600   |
| <sup>d</sup> ECR8214 Epoxy acrylate        | polyacrylic     | epoxy                | >60   | N/A     | 1200-1800 |
| <sup>d</sup> ECR4204 Epoxy acrylic/styrene | acrylic/styrene | epoxy                | >140  | N/A     | 275-450   |
| <sup>d</sup> ECR8310 Amino C2 acrylate     | polyacrylic     | amino (short spacer) | >70   | N/A     | 850-1200  |
| <sup>d</sup> ECR8319 Amino C2 acrylate     | polyacrylic     | amino (short spacer) | >50   | N/A     | 1600-2000 |
| <sup>d</sup> ECR8405 Amino C6 acrylate     | polyacrylic     | amino (long spacer)  | >40   | N/A     | 450-850   |
| <sup>d</sup> ECR8417 Amino C6 acrylate     | polyacrylic     | amino (long spacer)  | >50   | N/A     | 1600-2200 |
| <sup>e</sup> Eupergit C                    | polyacrylic     | epoxy                |       |         |           |
| <sup>f</sup> SPRINbeads AH130              | polyacrylic     | amino (long spacer)  | 40-60 | 0.6-0.8 | 400-600   |
| <sup>f</sup> SPRINbeads AH110              | polyacrylic     | amino (long spacer)  | 60-80 | 0.2-0.4 | 100-200   |
| <sup>f</sup> SPRINbeads AA130              | polyacrylic     | amino (short spacer) | 40-60 | 0.6-0.8 | 400-600   |
| <sup>f</sup> SPRINbeads AA110              | polyacrylic     | amino (short spacer) | 60-80 | 0.2-0.4 | 100-200   |
| <sup>f</sup> SPRINbeads AE130              | polyacrylic     | epoxy                | 40-60 | 0.6-0.8 | 400-600   |
| <sup>f</sup> SPRINbeads AE110              | Polyacrylic     | epoxy                | 60-80 | 0.2-0.4 | 100-200   |
